# Supplementary material for: Detection of SARS-CoV-2 and its S and N proteins using surface enhanced Raman spectroscopy
Source: PubMed Central journal article supplement — RSC Adv. 2021 Jul 26;11(41):25788–94. doi: 10.1039/d1ra03481b (PMC9037103; doi:10.1039/d1ra03481b), 2021-07-26
Supplement: RA-011-D1RA03481B-s001.pdf [file RA-011-D1RA03481B-s001.pdf]

Electronic Supplementary Material (ESI) for RSC Advances.

## Supplementary Information

### Detection of SARS-CoV-2 and its S and N proteins using Surface Enhanced Raman Spectroscopy

John Eder Sanchez,<sup>a,c,f</sup> Sierra A. Jaramillo,<sup>b</sup> Erik Settles,<sup>b</sup> J. Jesus Velazquez Salazar,<sup>a,f</sup> Alexander Lehr,<sup>a,f</sup> Javier Gonzalez,<sup>c</sup> Carmen Rodríguez Aranda,<sup>c</sup> Hugo R. Navarro-Contreras,<sup>c</sup> Marlee O. Ranieri,<sup>b</sup> Maxx Harvey,<sup>b</sup> David M.

---

<sup>a</sup> Applied Physics and Materials Science Department (APMS), Northern Arizona University – AZ, USA.

<sup>b</sup> Pathogen and Microbiome Institute, Northern Arizona University – AZ, USA.

<sup>c</sup> Centro de Investigación Aplicada en Ciencia y Tecnología (CIACYT) Universidad Autónoma de San Luis Potosí - Mexico.

<sup>d</sup> Department of Chemistry, Northern Arizona University – AZ, USA.

<sup>e</sup> Department of Biological Sciences, Northern Arizona University – AZ, USA.

<sup>f</sup> Center for Materials Interfaces Research and Applications for Materials (iMIRA!), Northern Arizona University -AZ, USA.

† Footnotes relating to the title and/or authors should appear here.

Electronic Supplementary Information (ESI) available: [details of any supplementary information available should be included here]. See DOI: 10.1039/x0xx00000x

Wagner,<sup>b</sup> Andrew Koppisch,<sup>e,f</sup> Robert Kellar,<sup>e,f</sup> Paul Keim,<sup>b</sup> and Miguel Jose Yacamán<sup>a,f\*</sup>

#### Experimental section:

##### Chemicals and Materials.

Hydrogen tetrachloroaurate(III) hydrate (HAuCl<sub>4</sub>), copper(II) chloride (CuCl<sub>2</sub>), oleylamine (OLA), and ethanol were purchased from Sigma-Aldrich, all reagents were analytical grade and were used for the synthesis without any further purification, the synthesis comprises three steps:

##### Synthesis of Au Seeds.

In a 20 mL glass vial, 7 mL of OLA was combined with 50 μL of HAuCl<sub>4</sub> (0.1 M) dissolved in ethanol with stirring by vortex and placed on a hot plate. Then, the temperature was increased to 120 °C. The color of the solution changed gradually from pale yellow to light pink and then to wine red, the final color. The wine-red color indicates the formation of the small Au seeds. The solution was then allowed to cool to room temperature.

##### Synthesis of Concave Pentagonal Nanoparticles

In a 20 mL glass vial, 5 mL of OLA and 2 mL of Au seeds were mixed at room temperature. Then, 75 μL of HAuCl<sub>4</sub> (0.1 M in ethanol) and 50 μL of CuCl<sub>2</sub> (0.1 M in ethanol) were sequentially injected into the mixture and heated to 120 °C for 10 min.

##### Synthesis of Concave Nanostars.

In a 20 mL glass vial at room temperature, a growth solution was prepared by adding 600  $\mu\text{L}$  of  $\text{CuCl}_2$  (0.1 M in ethanol) and 200  $\mu\text{L}$  of  $\text{HAuCl}_4$  (0.1 M in ethanol) to 7 mL of OLA (3:1). Subsequently, 400  $\mu\text{L}$  of freshly prepared CPNPs were added to the mixture. The solution was heated at 120  $^\circ\text{C}$  for 30 min and then cooled at room temperature. The color of the solution at this last step was brown-green.

### Characterization.

Structural features of the produced NPs were characterized by electron microscopy. SEM was performed on a Hitachi 5500 high-resolution microscope operating at 30 kV, equipped with bright-field and annular dark-field detectors, and a Bruker Quantax 200 EDS system.

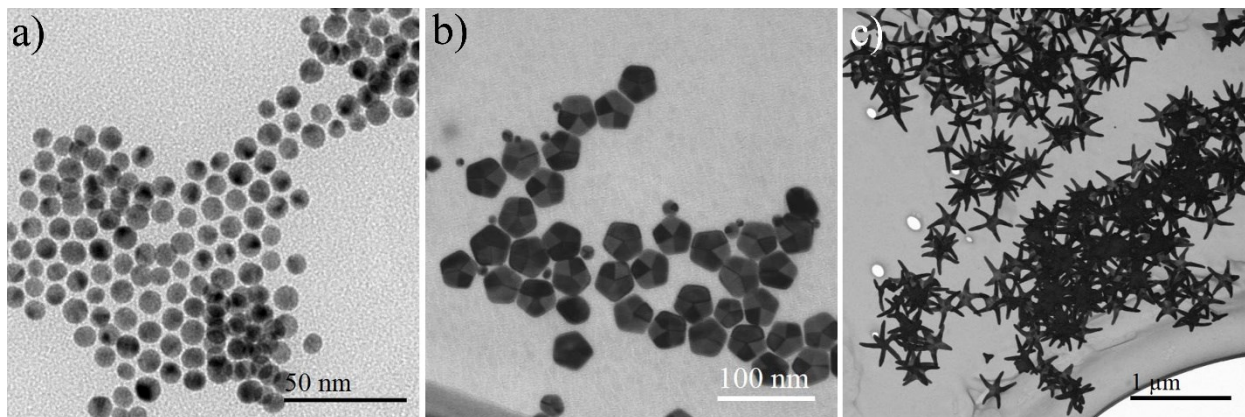

Figure S1: SEM image of the Au, Au-Cu nanostar used as SERS substrate (a) Au seeds, (b) Au-Cu seeds, (c) Au-Cu nanostars.

### Results and discussion:

3D protein structures and region of interest, simulated through using Gaussian [5] to obtain the vibrational frequencies based on the Hartree-Fock approximation are shown in Figure S2 –S4.

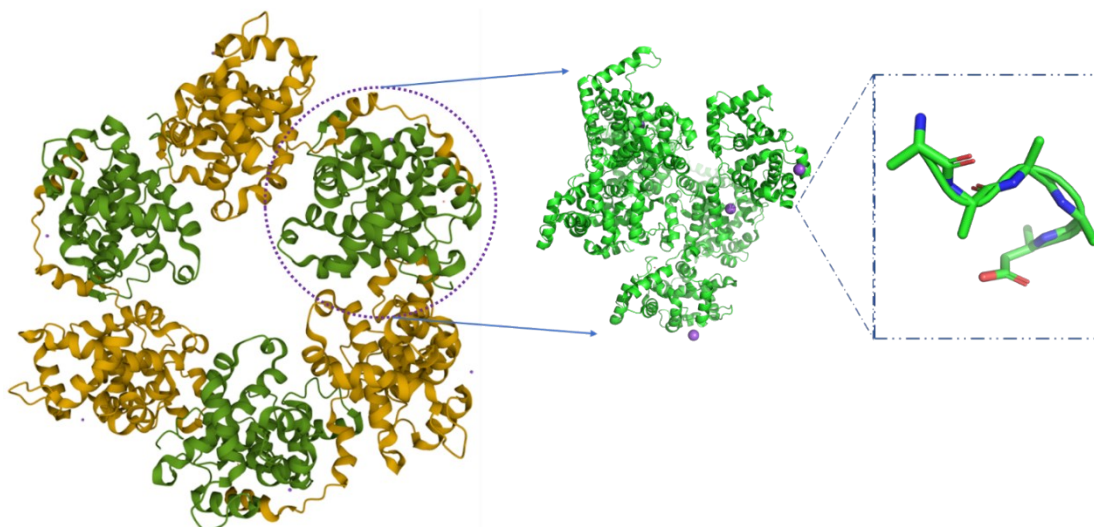

Figure S2. 3D structure of the protein - N (5fva [1]) asymmetric unit 9625 atoms and the region simulated for Raman frequencies [5].

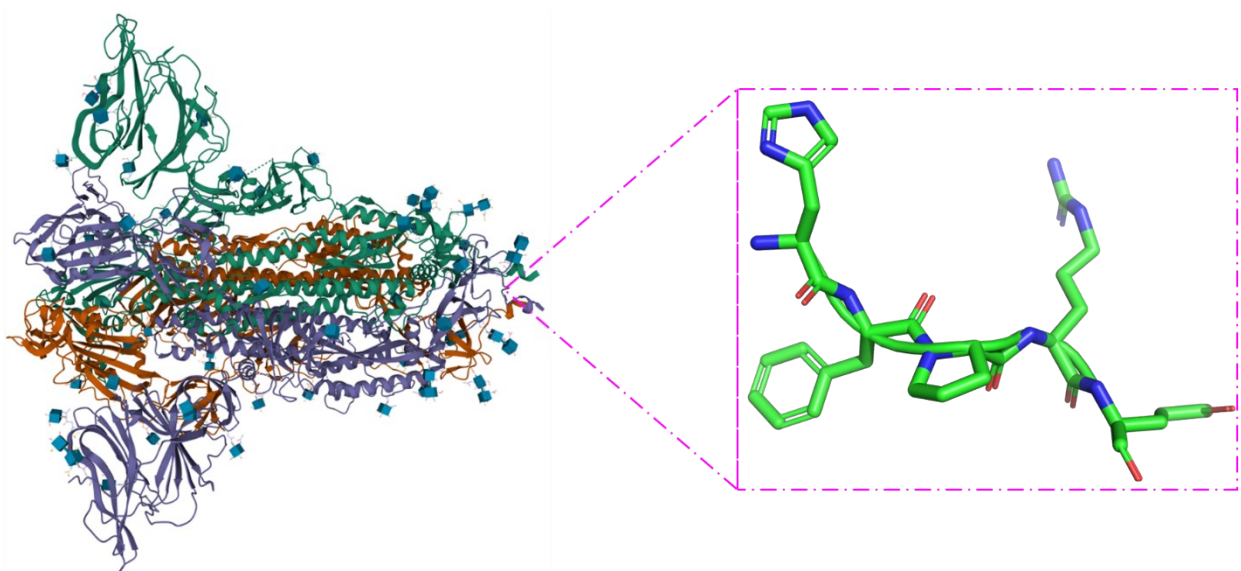

Figure S3. 3D structure of the Closed conformation of D614G SARS-CoV-2 spike protein (7bnm [2]) asymmetric unit 3207 atoms and the region simulated for Raman frequencies [5].

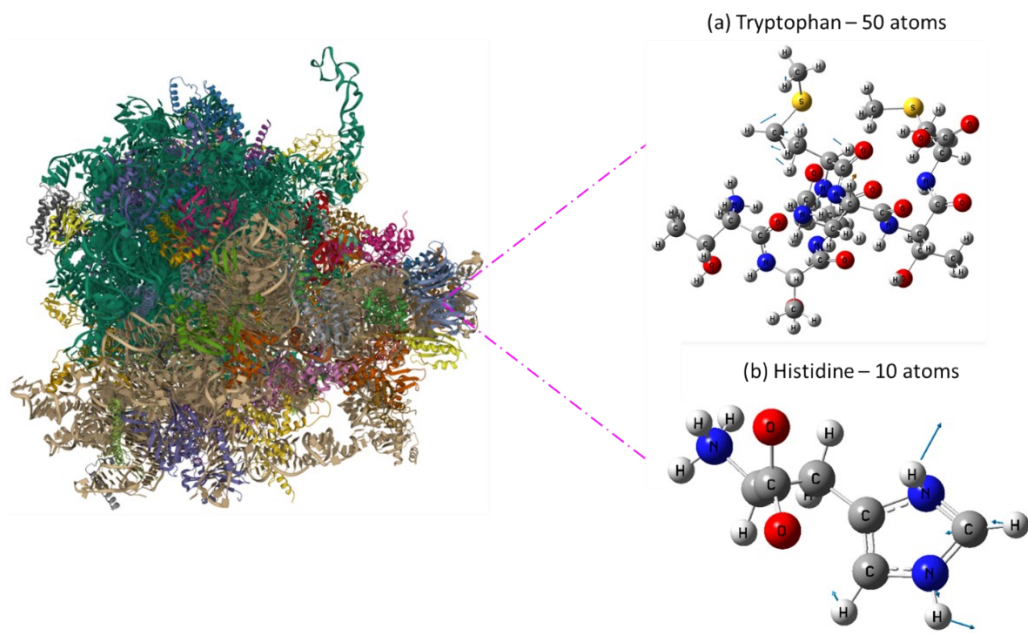

Figure S4. 3D structure of the SARS-CoV-2 Nsp1 bound to the human CCDC124-80S-eRF1 ribosome complex (6zme [3]) asymmetric unit 233375 atoms and the region simulated for Raman frequencies [5].

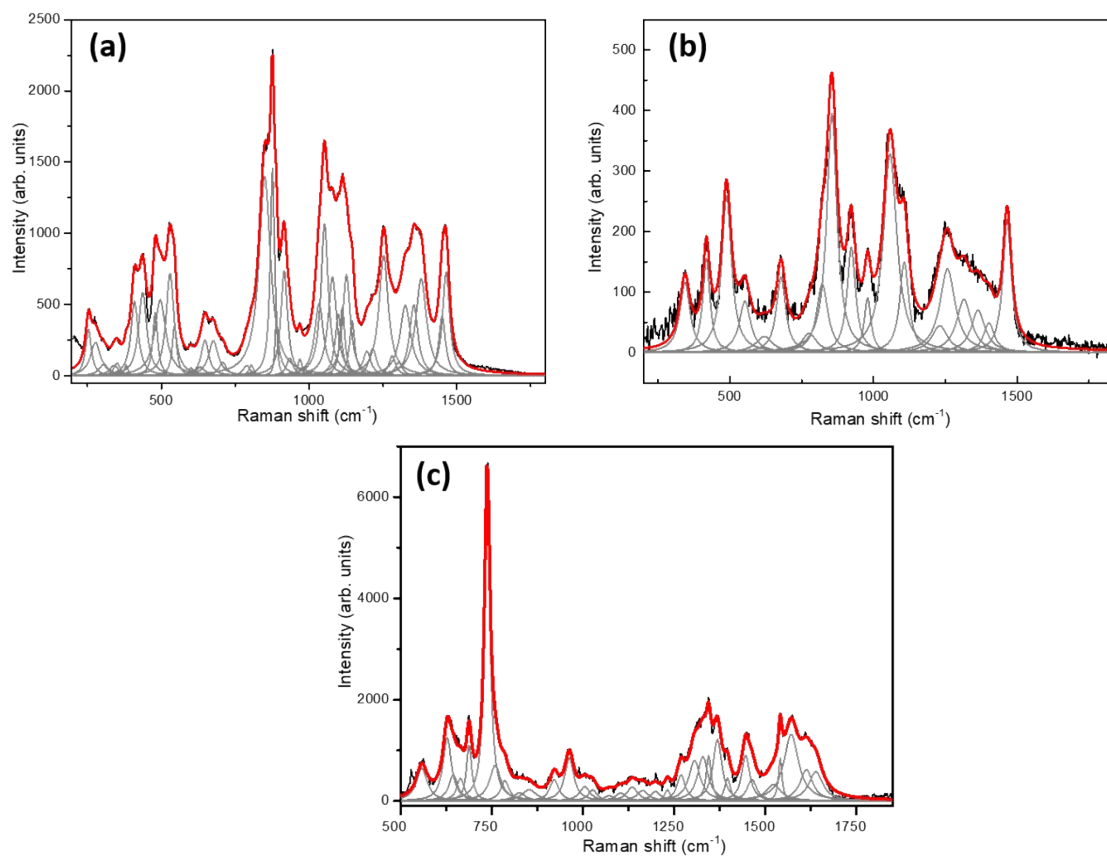

Figure S5. (a-c) examples of the deconvolution (red line) of the Raman peaks for S, N protein and NL-63, respectively, all spectral details, originating of the side-chains of the amino-acids, as well as from the peptide bonds (amide fingerprints) constitutive of the virion proteins are expected to be found in this spectral region [4]. The deconvolution data was processed by averaging 30-50 different spectra and after suppressing the background of the Raman signal by fitting the spectra curve using the cyclic approximation method, i.e., a polynomial (degree varying from 2 - 11) fitting is used in order to get a low-order S/N signal and a smoothness spectrum without little to nothing data treatment.

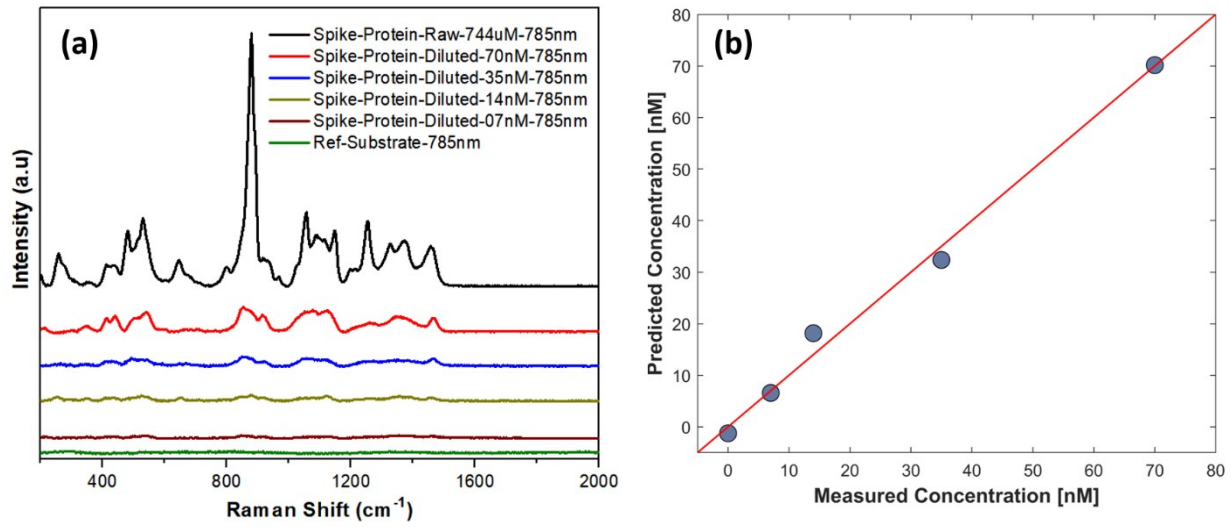

Figure S6. calibration curve and limit of detection for the S protein. (a) raw SERS spectra of the InBios-Spike-Protein for concentrations ranging from 744μM – 7nM. (b) calibration curve obtained by using PLSR (Partial Least Squares Regression) with two principal components. The variance for the two components was calculated to be 99.9%. Similarly, the detection limit was found to be  $8.89 \times 10^{-9}$  M with Root Mean Square Error (RMSE) =  $2.27 \times 10^{-9}$ .

| Dimensions related.<br>SARS-CoV-2 virion | Length<br>(nm) | Copies<br>(Number) |
|------------------------------------------|----------------|--------------------|
| SARS-CoV-2 virion                        | 100            | —                  |
| SARS-CoV-2 - Spike protein               | 9 - 12         | —                  |
| Membrane Protein                         | —              | 2000               |
| Nucleoprotein                            | —              | 1000               |
| Envelope Protein                         | —              | 20                 |

Table S1. Dimensions of S, N and NL-63 proteins.

## References

1. Baklouti, A., Goulet, A., Lichiere, J., Canard, B., Charrel, R. N., Ferron, F., Coutard, B. & Papageorgiou, N. (2017). *Acta Cryst. D* 73, 650-659 D. Sehnal, S. Bittrich, M. Deshpande, R. Svobodová, K. Berka, V. Bazgier, S. Velankar, S.K. Burley, J. Koča, A.S. Rose (2021) Mol\* Viewer: modern web app for 3D visualization and analysis of large biomolecular structures. *Nucleic Acids Research*. doi: 10.1093/nar/gkab314), and RCSB PDB.
2. Benton, D.J., Wrobel, A.G., Rosenthal, P.B., Gamblin, S.J. The Francis Crick Institute, 2021-02-03, DOI: 10.2210/pdb7BNM/pdbEMDataResource: EMD-12229 D. Sehnal, S. Bittrich, M. Deshpande, R. Svobodová, K. Berka, V. Bazgier, S. Velankar, S.K. Burley, J. Koča, A.S. Rose (2021) Mol\* Viewer: modern web app for 3D visualization and analysis of large biomolecular structures. *Nucleic Acids Research*. doi: 10.1093/nar/gkab314), and RCSB PDB.
3. Thoms, M., Buschauer, R., Ameismeier, M., Denk, T., Kratzat, H., Mackens-Kiani, T., Cheng, J., Berninghausen, O., Becker, T., Beckmann, R. German Research Foundation (DFG) 2020-08-12. DOI: 10.2210/pdb6ZME/pdbEMDataResource: EMD-11289. Sehnal, S. Bittrich, M. Deshpande, R. Svobodová, K. Berka, V. Bazgier, S. Velankar, S.K. Burley, J. Koča, A.S. Rose (2021) Mol\* Viewer: modern web app for 3D visualization and analysis of large biomolecular structures. *Nucleic Acids Research*. doi: 10.1093/nar/gkab314), and RCSB PDB.
4. Zhu, G. Y., Zhu, X., Fan, Q., Wan, X. L. (2011). Raman spectra of amino acids and their aqueous solutions. *Spectrochimica Acta Part A: Molecular and Biomolecular Spectroscopy*. 78(3), 1187-1195.
5. Gaussian 03, Revision B.01, M. J. Frisch, G. W. Trucks, H. B. Schlegel, G. E. Scuseria, M. A. Robb, J. R. Cheeseman, J. A. Montgomery, Jr., T. Vreven, K. N. Kudin, J. C. Burant, J. M. Millam, S. S. Iyengar, J. Tomasi, V. Barone, B. Mennucci, M. Cossi, G. Scalmani, N. Rega, G. A. Petersson, H. Nakatsuji, M. Hada, M. Ehara, K. Toyota, R. Fukuda, J. Hasegawa, M. Ishida, T. Nakajima, Y. Honda, O. Kitao, H. Nakai, M. Klene, X. Li, J. E. Knox, H. P. Hratchian, J. B. Cross, C. Adamo, J. Jaramillo, R. Gomperts, R. E. Stratmann, O. Yazyev, A. J. Austin, R. Cammi, C. Pomelli, J. W. Ochterski, P. Y. Ayala, K. Morokuma, G. A. Voth, P. Salvador, J. J. Dannenberg, V. G. Zakrzewski, S. Dapprich, A. D. Daniels, M. C. Strain, O. Farkas, D. K. Malick, A. D. Rabuck, K. Raghavachari, J. B. Foresman, J. V. Ortiz, Q. Cui, A. G. Baboul, S. Clifford, J. Cioslowski, B. B. Stefanov, G. Liu, A. Liashenko, P. Piskorz, I. Komaromi, R. L. Martin, D. J. Fox, T. Keith, M. A. Al-Laham, C. Y. Peng, A. Nanayakkara, M. Challacombe, P. M. W. Gill, B. Johnson, W. Chen, M. W. Wong, C. Gonzalez, and J. A. Pople, Gaussian, Inc., Pittsburgh PA, 2003.
